# Supplementary material
Source: publisher figshare collection journal article supplement (https://gsajournals.figshare.com/ndownloader/files/15259346)
Supplement: Supplementary file 1 [file 15259346]

Supplementary figures for "The Evolutionary Dynamics of a  
Genetic Barrier to Gene Flow: From the Establishment to  
the Emergence of a Peak of Divergence"

Takahiro Sakamoto and Hideki Innan

May 27, 2019

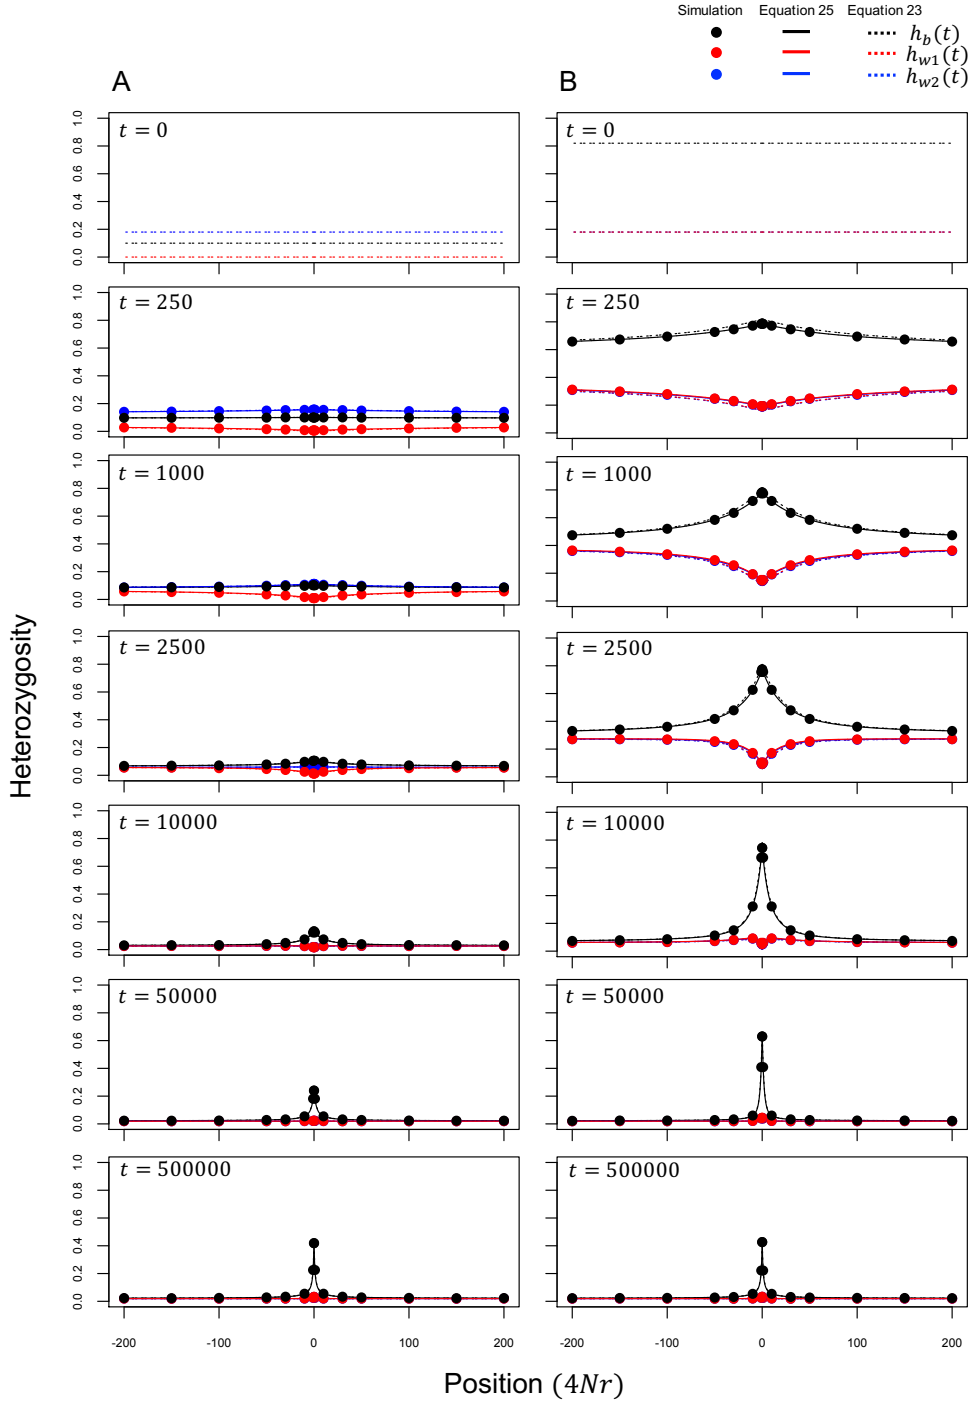

**Figure S1:** Temporal change of heterozygosity ( $h_{w1}$ ,  $h_{w2}$ ,  $h_b$ ) as a function of recombination rate (A) after a local sweep in subpopulation I and (B) after a secondary contact.  $y_1(0) = 0.0$  and  $y_2(0) = 0.1$  are assumed in (A), whereas  $y_1(0) = 0.1$  and  $y_2(0) = 0.9$  in (B). Theoretical results from Equations 23 and 25 are shown by broken and solid lines, respectively. Simulation results (closed circles) are the averages over 50,000 replications of forward simulation. The left panel is identical to Figure 5.

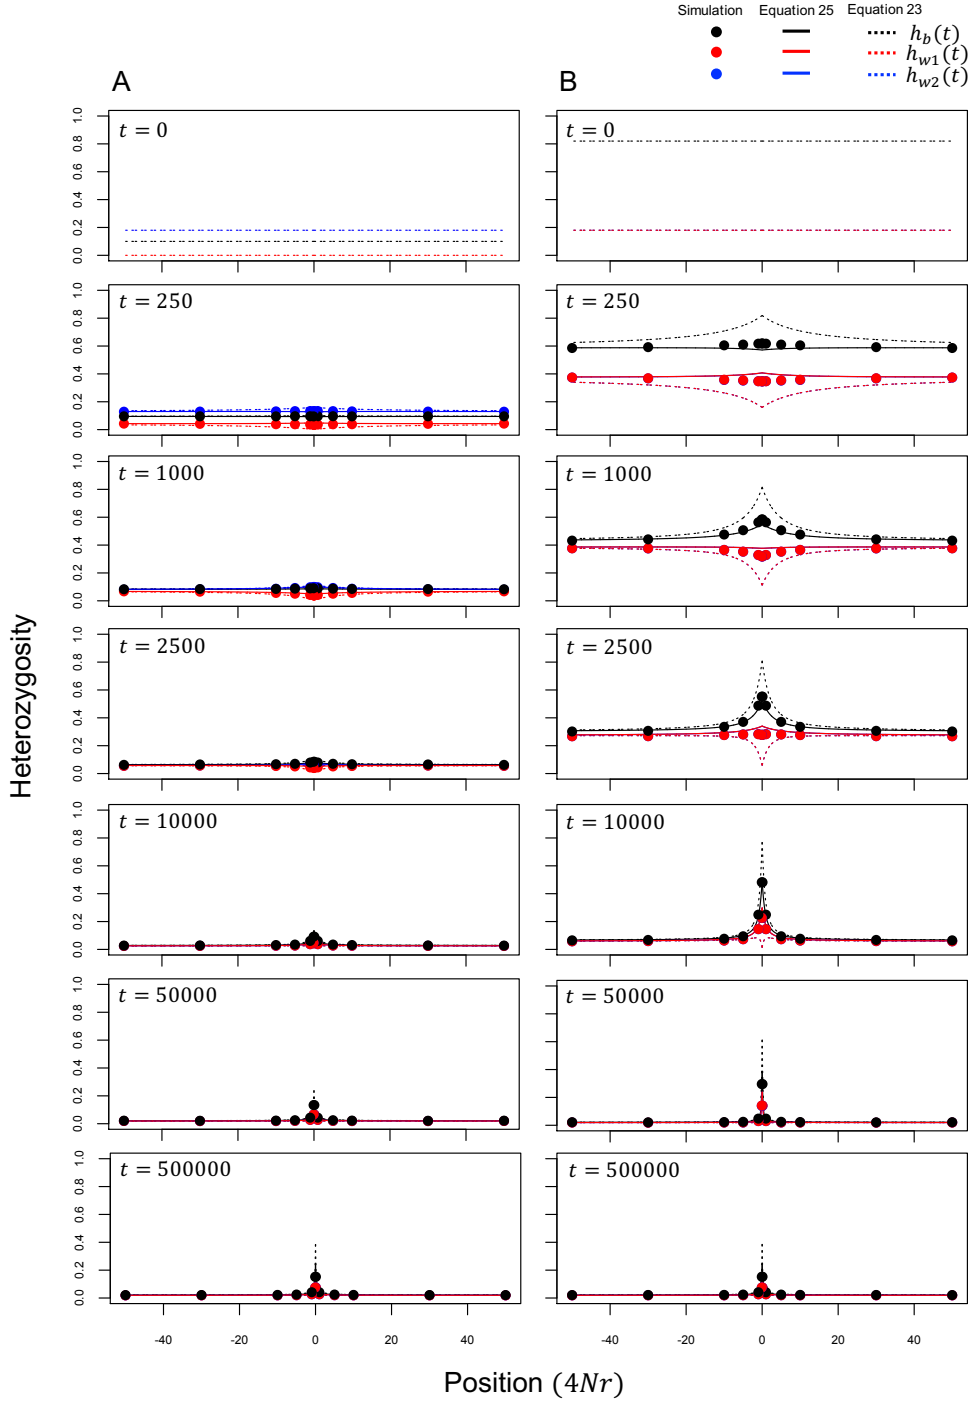

**Figure S2:** Temporal change of heterozygosity ( $h_{w1}$ ,  $h_{w2}$ ,  $h_b$ ) as a function of recombination rate (A) after a local sweep in subpopulation I and (B) after a secondary contact. We here set  $4N_1s_1 = -4N_2s_2 = 20$ , while all other parameters are the same as those for Figure S1. The theoretical results from Equations 23 and 25 are shown by broken and solid lines, respectively. Simulation results (closed circles) are the averages over 50,000 replications of forward simulations.
